# Supplementary material for: Misidentification Subtype of Alzheimer's Disease Psychosis Predicts a Faster Cognitive Decline
Source: PubMed Central journal article supplement — CPT Pharmacometrics Syst Pharmacol. 2019 Mar 15;8(5):308–15. doi: 10.1002/psp4.12389 (PMC6533361; doi:10.1002/psp4.12389), 2019-03-15
Supplement: PSP4-8-308-s005.pdf [file PSP4-8-308-s005.pdf]

## Dataset description

**RID** column contains patient identification number in ADNI2

**VISCODE** column contains visit number:

- v03 or v06 =baseline ADNI2 visit
- v05= 6 months follow up visit
- V11= one year follow up visit
- V21= two years follow up visit
- V31= three years follow up visit
- V41= four years follow up visit.

**Diagnosis** column contains data about diagnosis:

- AD= Alzheimer's disease
- LMCI= late Mild cognitive impairment
- EMCI= early MCI
- cAD= converted during ADNI2 to Alzheimer's disease
- cLMCI=converted during ADNI2 to LMCI
- Normal= healthy control

**TIMEy** column contains time in years since baseline visit

**Y** is the observation column and contains data on both ADAS-cog score and time in years since the baseline visit. Each patient has two rows per visit; one row with log-transformed ADAS-cog score for the disease progression model and one row with time in years since the baseline visit for the drop-out model

**Subtype** column contains categorical covariate for psychotic subtype.

- 1 = "paranoid"
- 2 = "misidentification"
- 3 = "mixed".

**Gender** column contains categorical covariate for gender

- 1 = "male"
- 2 = "female"

**PT Educat** column contains continuous covariate for years of education

**APOE4** column contains categorical covariate for allele carrier.

- 0 = "not being a carrier of Apo-e ε4"
- 1 = "being a carrier of at least one allele of Apo-e ε4"

**Cog enh** column contains data about cognitive enhancer medication.

- 0= "Cognitive enhancer not prescribed"
- 1="Cognitive enhancer prescribed "

**age.baseline** column contains continuous covariate for age in years at baseline visit.

**MMSE base** column contains continuous covariate for MMSE score at baseline visit.

**Y TYPE** column defines the type of observation.

- 1 = time in years since the baseline visit
- 2 = ADAS-cog score
